# Supplementary material
Source: publisher figshare collection journal article supplement (https://acs.figshare.com/ndownloader/files/21823020)
Supplement: Supplementary file 1 [file 21823020]

## Supporting Information

### Dynamics of the Excited State in Photosynthetic Bacterial Reaction Centers

William W. Parson<sup>†</sup>

<sup>†</sup>Department of Biochemistry

University of Washington

Seattle, WA 98195

Email: parson@u.washington.edu

Figures S1 and S2 show spectra of the calculated Boltzmann-weighted Franck-Condon factors ( $FC_B$ ) for a model identical to that used to generate Figures 1 and 2 of the main text except that the three vibrational modes had energies of 20, 50 and 90  $\text{cm}^{-1}$  and dimensionless displacements ( $\Delta$ ) of 1.1, 0.7 and 0.2, respectively, in the diabatic CT state relative to the ground states (Huang-Rhys parameters  $S = \Delta^2/2$  of 0.605, 0.245 and 0.020). The displacements in the exciton state with respect to the ground state were 0.1 for all three modes ( $S = 0.005$ ), the same as in Figures 1 and 2. Excitation energies ( $h\nu$ ) are expressed relative to the 0-0 excitation of the diabatic exciton state ( $h\nu_{00}$ , *vertical dashed line*). The 0-0 excitation energy of the diabatic CT state (*vertical dotted line*) was either 400  $\text{cm}^{-1}$  above  $h\nu_{00}$  (Figure S1), or 400  $\text{cm}^{-1}$  below  $h\nu_{00}$  (Figure S2). The electronic-interaction matrix element ( $|V|$ ) was either 0, 200, 300 or 400  $\text{cm}^{-1}$  and the temperature either 80 K or 300 K, as indicated.  $FC_B$  was calculated by equation (1) of the main text.

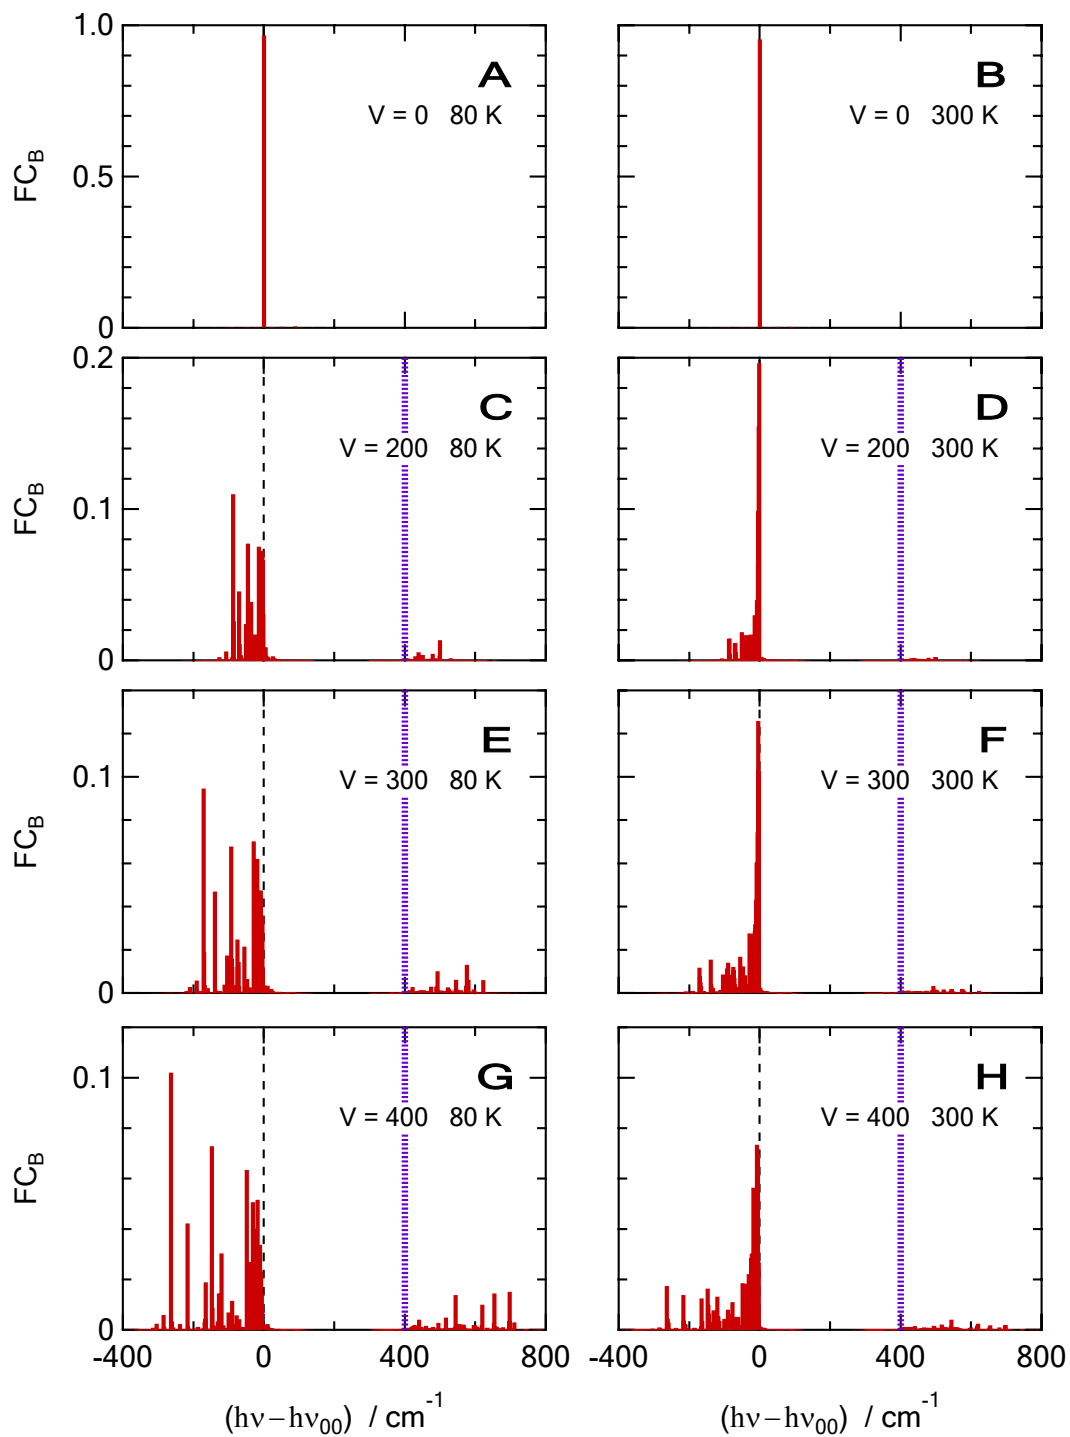

**Figure S1.** Boltzmann-weighted Franck-Condon factors ( $FC_B$ ) for absorption at either 80 K (*left*) or 300 K (*right*) by a system in which exciton and CT excitations are coupled to three vibrational modes with the parameters given above. The 0-0 excitation energy of the diabatic CT state (*vertical dotted line*) was  $400\text{ cm}^{-1}$  above  $h\nu_{00}$ .

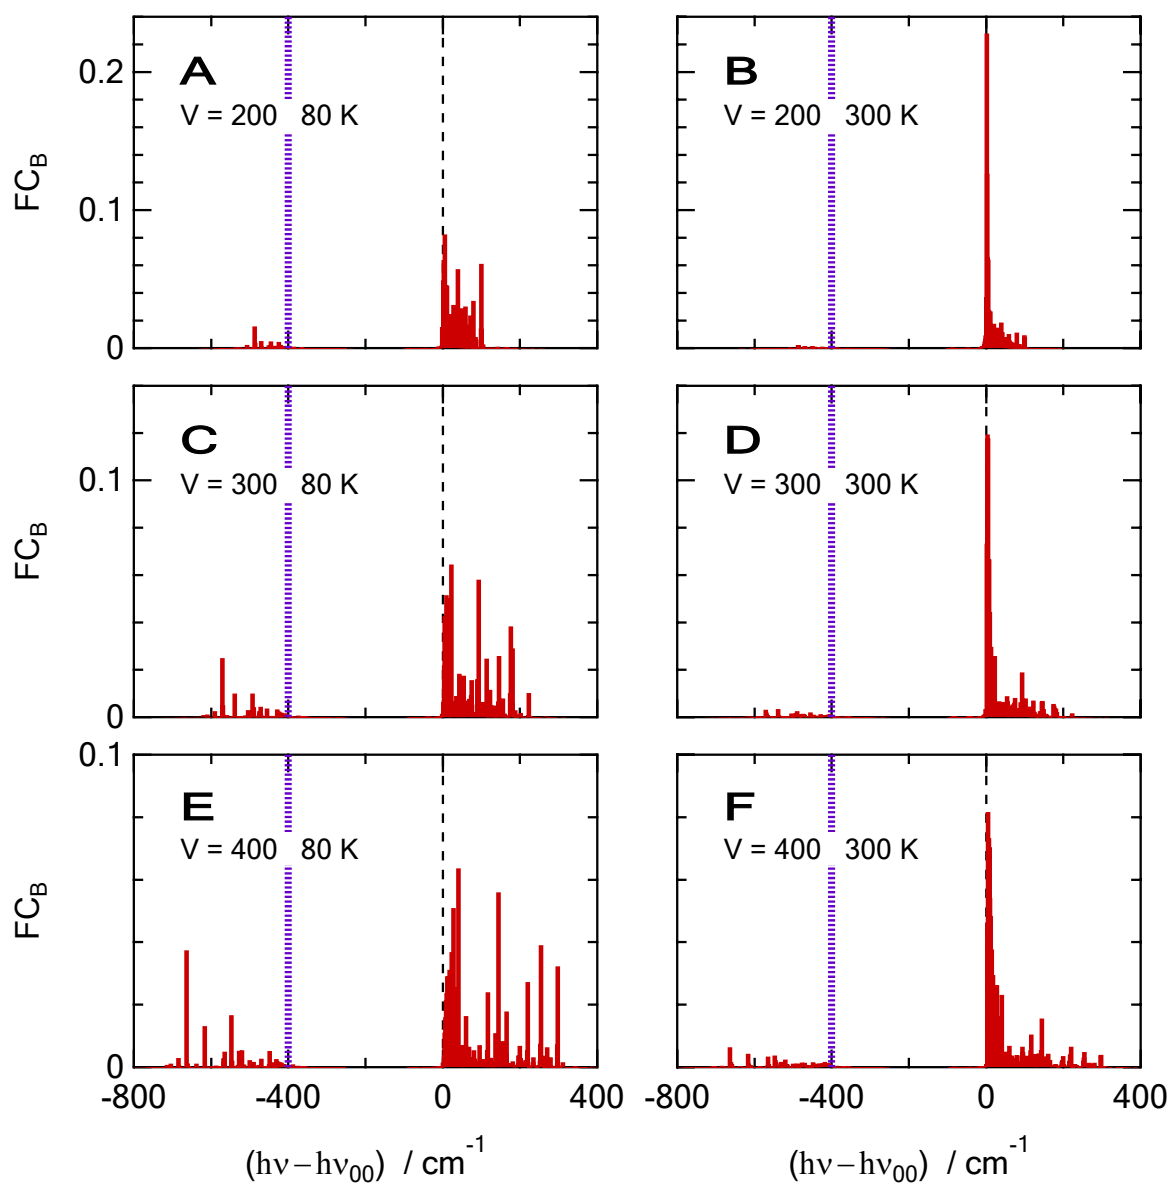

**Figure S2.** The same as Figure S1 except that the 0-0 excitation energy of the diabatic CT state (*vertical dotted line*) was  $400 \text{ cm}^{-1}$  below  $h\nu_{00}$ .

Figure S3 shows calculated Boltzmann-weighted dipole strengths of the vibronic absorption lines of a homodimer with strong exciton interactions but no CT states. Each of the monomers is assumed to have a single excited state and three harmonic vibrational modes with energies of 20, 50 and 90  $\text{cm}^{-1}$  and Huang-Rhys factors of 0.605, 0.245 and 0.020, respectively (the same as those of the CT state in Figures S1 and S2). The exciton-interaction matrix element is +300  $\text{cm}^{-1}$  (the same as in Figure S1E). The angle between the transition dipoles of the monomers is  $165^\circ$ , resembling the angle between the  $Q_y$  transitions of bacteriochlorophylls  $P_L$  and  $P_M$  in the reaction center. With this geometry, most of the dimer's dipole strength appears in an absorption band 300  $\text{cm}^{-1}$  to the red of the monomers'  $\Delta E_{00}$ . Lowering the temperature from 300 to 80 K strengthens vibronic lines on the blue side of the band relative to those on the red side, shifting the spectrum slightly to the *blue*.

The Boltzmann-weighted dipole strengths in Figure S3 were calculated as

$$DS_B(\nu, T) = \sum_{i=1}^I B(i, T) \sum_{j=1}^J \delta_{h\nu, E_j - E_i} \left| \sum_{l=1}^L c_l^j \vec{\mu}_l \Pi_m \Omega(m, i, l) \right|^2. \quad (\text{S1})$$

Here  $I$  and  $L$  are, respectively, the total numbers of vibronic ground and excited basis states, and  $J$  is the number of the dimer's excited eigenstates;  $E_i$  and  $E_j$  are the energies of ground state  $i$  and excited eigenstate  $j$ ;  $B(i, T) = Z^{-1} \exp(-E_i/k_B T)$  is the Boltzmann population of ground state  $i$  at temperature  $T$ ;  $Z = \sum_i^I \exp(-E_i/k_B T)$ ; the delta function  $\delta_{h\nu, E_j - E_i}$  is 1 if  $h\nu = E_j - E_i$ , and zero otherwise;  $c_l^j$  is the coefficient for excited basis state  $l$  in eigenvector  $j$ ;  $\Omega(m, i, l)$  is the overlap integral for excitation of harmonic oscillator  $m$  from ground level  $i$  to exciton level  $l$ ; and  $\vec{\mu}_l$  is the electronic transition dipole for basis excitation  $l$ . Equation (1) of the main text is a generalization of equation (S1) for a system that includes CT states, but with the dependence on the vectorial factors  $\vec{\mu}_l$  omitted because these are assumed to have the same magnitude and orientation for all the exciton basis transitions and a magnitude of zero for CT transitions.

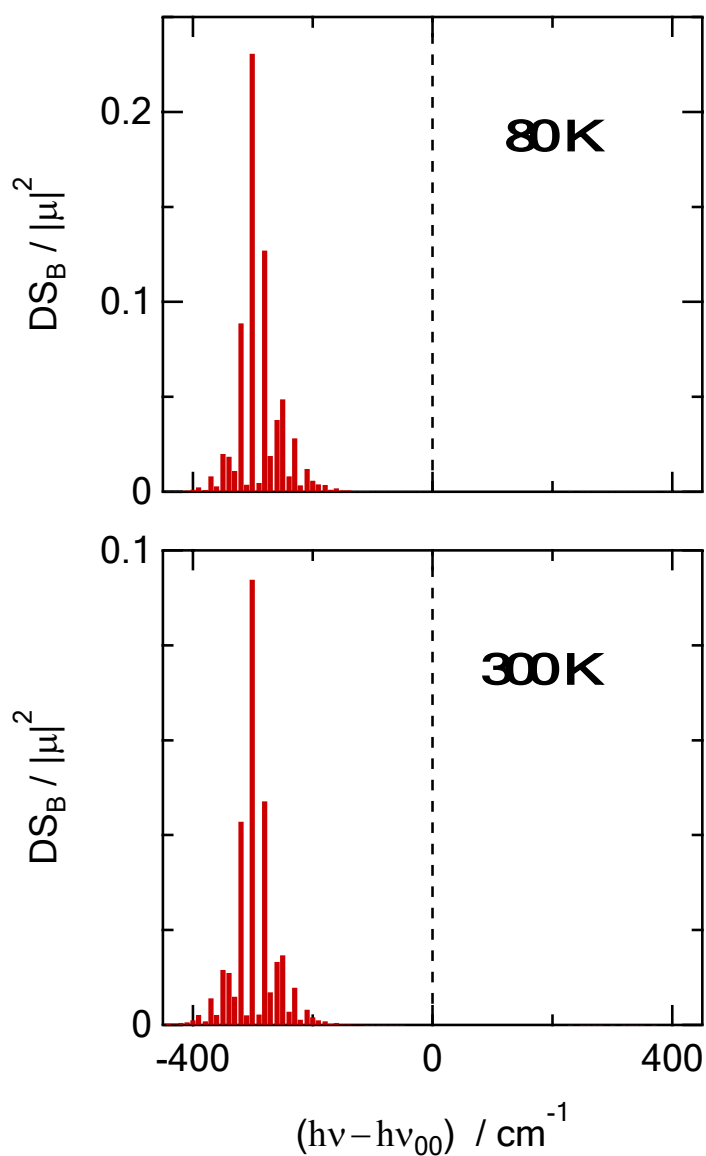

**Figure S3.** Stick spectra of the Boltzmann-weighted vibronic dipole strength ( $DS_B$ ) at (*top*) 80 and (*bottom*) 300 K for the homodimer described above, in which the two molecules have strong exciton interactions but no CT interactions. The divisor for the ordinate scale ( $|\mu|^2$ ) is the squared amplitude of the monomers' electronic transition dipole ( $\mu_l$  in equation S1), which is assumed to be the same for all vibrational levels ( $l$ ). Energies are expressed relative to the monomers' 0-0 excitation energy ( $h\nu_{00}$ , *dashed line*).

Figure S4 and Table S1 illustrate the effects of temperature on the Boltzmann-weighted Franck-Condon factors ( $FC_B$ ) for a system with ground, exciton and CT electronic states and a single, harmonic vibrational mode. The zero-point energy of the CT basis state is taken to be 400  $\text{cm}^{-1}$  above the corresponding energy of the exciton state, and the electronic-interaction matrix element ( $|V|$ ) that mixes exciton and CT states is 400  $\text{cm}^{-1}$ . The vibrational mode has an energy of 20  $\text{cm}^{-1}$  and Huang-Rhys factors of 0.005 and 0.605 for conversion of the ground state to the exciton and CT states, respectively (the same as the lowest-frequency mode in Figures S1 and S2). The figure shows the calculated spectrum of  $FC_B(\nu, T)$  in the region of the main absorption band, which lies to the red of the of the exciton basis state's 0-0 energy ( $h\nu_{00}$ ). When the temperature is decreased from 300 to 80 K, vibronic lines farther to the red gain strength relative to those at higher energies as they do in the three-mode models used for Figures 1 and S1. Table S1 gives the factors that enter into selected values of  $FC_B(\nu, T)$  at 80 and 300 K, according to equation (1) of the main text. The lines close to  $h\nu_{00}$  in the spectrum for 300 K are dominated by excitations to relatively high eigenstates from correspondingly high vibrational levels of the ground state, which have much smaller Boltzmann factors ( $B(i, T)$ ) at 80 K.

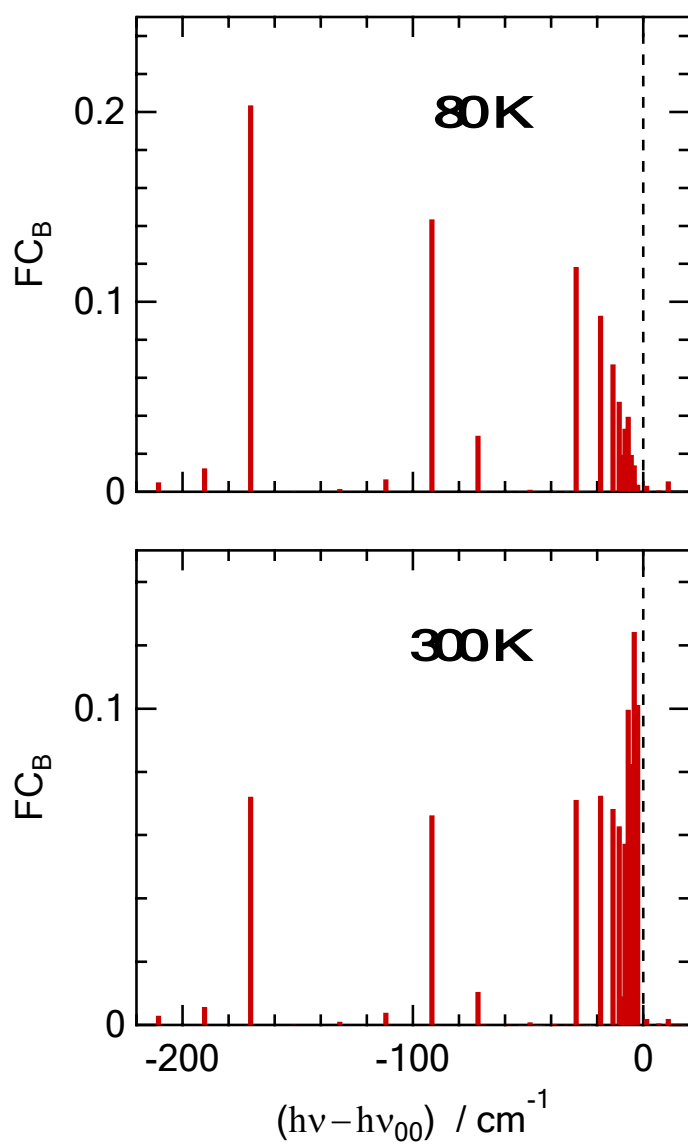

**Figure S4.** Calculated Boltzmann-weighted Franck-Condon factors for a system with three electronic states (ground, exciton and CT) and a single vibrational mode, at 80 K (*top*) and 300 K (*bottom*). The model and the values of its parameters are given above. The figure shows only the spectral region of the system's main absorption band.

**Table S1: Components of  $FC_B(v,T)$  in a System with 3 Electronic States (Ground, Exciton and CT) and 1 Vibrational Mode<sup>1</sup>**

| $i$ | $j$ | $l$ | $h\nu - h\nu_{00}$<br>cm <sup>-1</sup> | $ \mathcal{Q}(i,l) ^2$ | $ c_l^j ^2$ | $B(i,T)$<br>300 K | $FC(i,j,l,T)$<br>300 K | $B(i,T)$<br>80K | $FC(i,j,l,T)$<br>80 K |
|-----|-----|-----|----------------------------------------|------------------------|-------------|-------------------|------------------------|-----------------|-----------------------|
| 1   | 1   | 1   | -170.4                                 | 0.99501                | 0.67593     | 0.10721           | 0.07210                | 0.30236         | 0.20335               |
| 1   | 1   | 2   | -170.4                                 | 0.00498                | 0.05574     | 0.10721           | 0.00003                | 0.30236         | 0.00008               |
|     |     |     |                                        |                        |             |                   | <b>0.07213</b>         |                 | <b>0.20343</b>        |
| 2   | 2   | 1   | -91.8                                  | 0.00498                | 0.09448     | 0.09740           | 0.00005                | 0.21101         | 0.00010               |
| 2   | 2   | 2   | -91.8                                  | 0.98509                | 0.68982     | 0.09740           | 0.06619                | 0.21101         | 0.14339               |
| 2   | 2   | 3   | -91.8                                  | 0.00246                | 0.04372     | 0.09740           | 0.00001                | 0.21101         | 0.00002               |
|     |     |     |                                        |                        |             |                   | <b>0.06625</b>         |                 | <b>0.14351</b>        |
| 3   | 3   | 2   | -29.2                                  | 0.00246                | 0.09112     | 0.08849           | 0.00002                | 0.14725         | 0.00003               |
| 3   | 3   | 3   | -29.2                                  | 0.98017                | 0.81996     | 0.08849           | 0.07112                | 0.14725         | 0.11835               |
| 3   | 3   | 4   | -29.2                                  | 0.00163                | 0.00876     | 0.08849           | $< 5 \times 10^{-6}$   | 0.14725         | $< 5 \times 10^{-6}$  |
|     |     |     |                                        |                        |             |                   | <b>0.07114</b>         |                 | <b>0.11838</b>        |
| 4   | 4   | 3   | -18.5                                  | 0.00163                | 0.02080     | 0.08040           | $< 5 \times 10^{-6}$   | 0.10276         | $< 5 \times 10^{-6}$  |
| 4   | 4   | 4   | -18.5                                  | 0.97690                | 0.92285     | 0.08040           | 0.07248                | 0.10276         | 0.09265               |
|     |     |     |                                        |                        |             |                   | <b>0.07248</b>         |                 | <b>0.09265</b>        |
| 10  | 10  | 10  | -6.5                                   | 0.96722                | 0.98712     | 0.04522           | 0.04317                | 0.01187         | 0.01133               |
| 11  | 11  | 11  | -6.5                                   | 0.96625                | 0.98852     | 0.04108           | 0.03924                | 0.00828         | 0.00791               |
|     |     |     |                                        |                        |             |                   | <b>0.08241</b>         |                 | <b>0.01924</b>        |
| 12  | 12  | 12  | -3.9                                   | 0.96538                | 0.98964     | 0.03732           | 0.03566                | 0.00578         | 0.00552               |
| 13  | 13  | 13  | -3.9                                   | 0.96457                | 0.99056     | 0.03391           | 0.03240                | 0.00403         | 0.00385               |
| 14  | 14  | 14  | -3.9                                   | 0.96383                | 0.99132     | 0.03081           | 0.02944                | 0.00282         | 0.00269               |
| 15  | 15  | 15  | -3.9                                   | 0.96314                | 0.99167     | 0.02799           | 0.02674                | 0.00196         | 0.00188               |
|     |     |     |                                        |                        |             |                   | <b>0.12424</b>         |                 | <b>0.01394</b>        |

<sup>1</sup>See the text above for the electronic energies and other parameters of the model.

$i$  = vibrational level of ground state;  $j$  = excited eigenstate;  $l$  = vibrational level of exciton basis state.

$h\nu - h\nu_{00}$  = excitation energy relative to  $\Delta E_{00}$  for the exciton state.

$\mathcal{Q}(i,l)$  = nuclear overlap integral for excitation from ground vibrational level  $i$  to exciton level  $l$ .

$c_l^j$  = coefficient for exciton basis state  $l$  in eigenvector  $j$ .

$B(i,T)$  = Boltzmann factor for the relative population of ground level  $i$  at temperature  $T$ .

$FC(i,j,l,T) = B(i,T) \times |c_l^j|^2 \times |\mathcal{Q}(i,l)|^2$  (contribution of basis states  $i$  and  $l$  to the Boltzmann-weighted Franck-Condon factor for frequency  $\nu$  at temperature  $T$ ).

Entries in **Bolt font** are the sums of  $FC(i,j,l,T)$  for each energy and temperature.
